# Supplementary material for: SGLT2 inhibition alters substrate utilization and mitochondrial redox in healthy and failing rat hearts
Source: JCI journal article supplement (doi:10.1172/jci176708), 2024-12-15

# Uncropped Western Blots

176708-JCI-RG-RV-2 Goedeke *et al*

**Figure 3F**

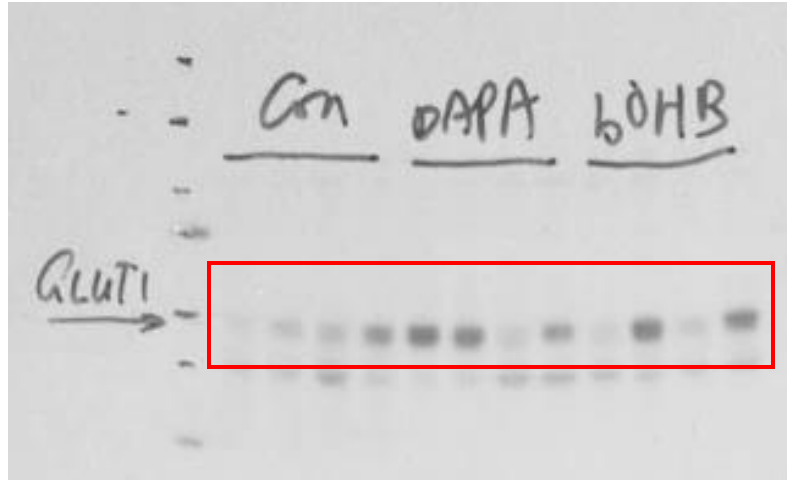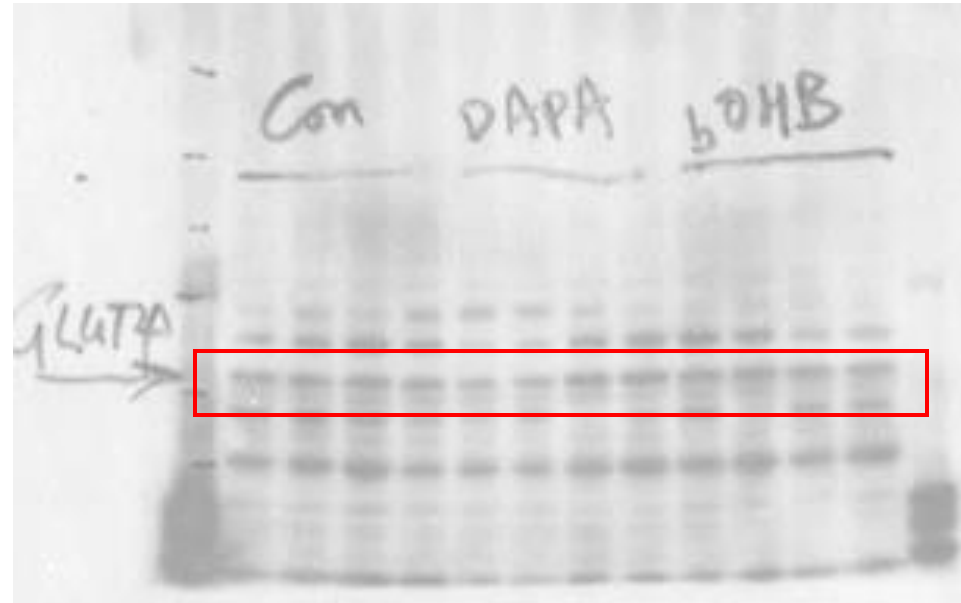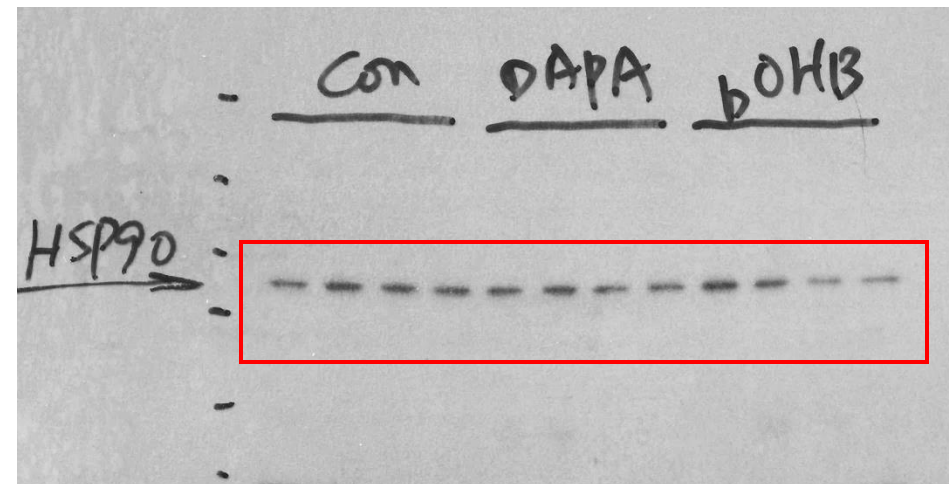

Figure 3G

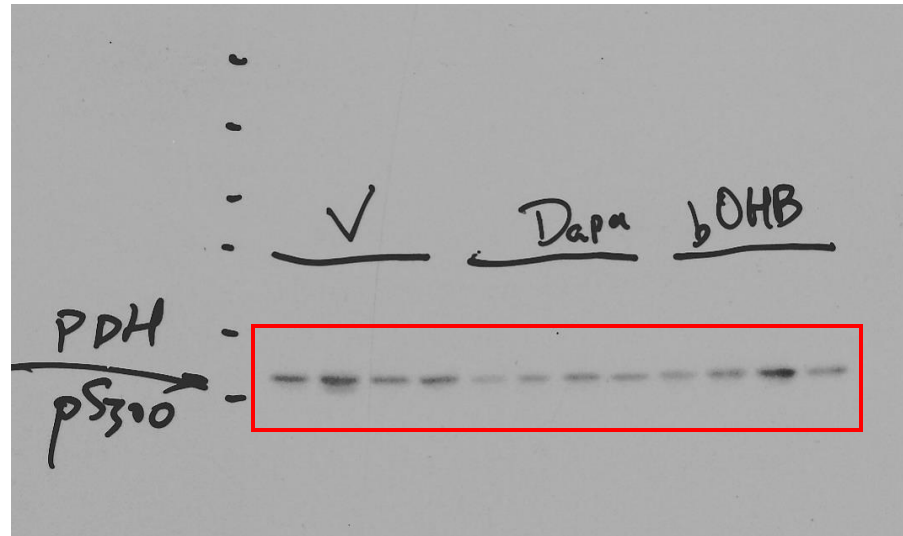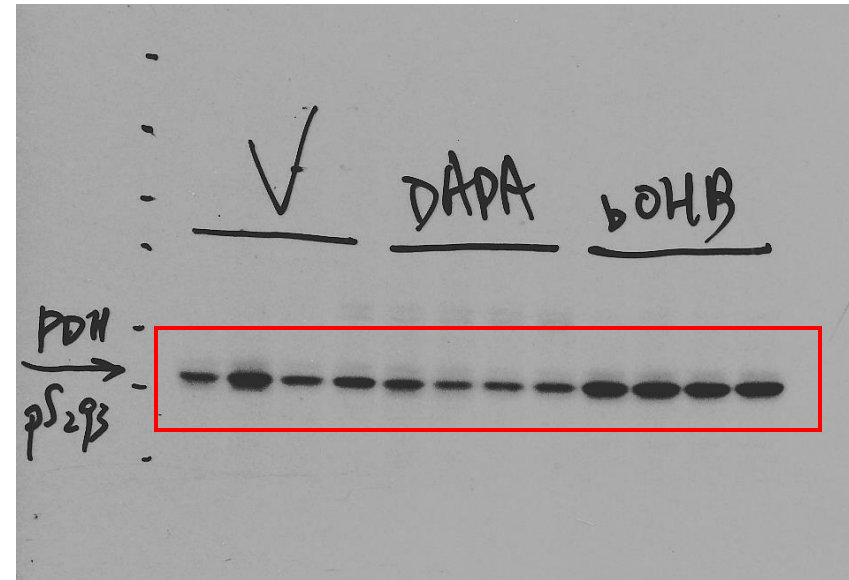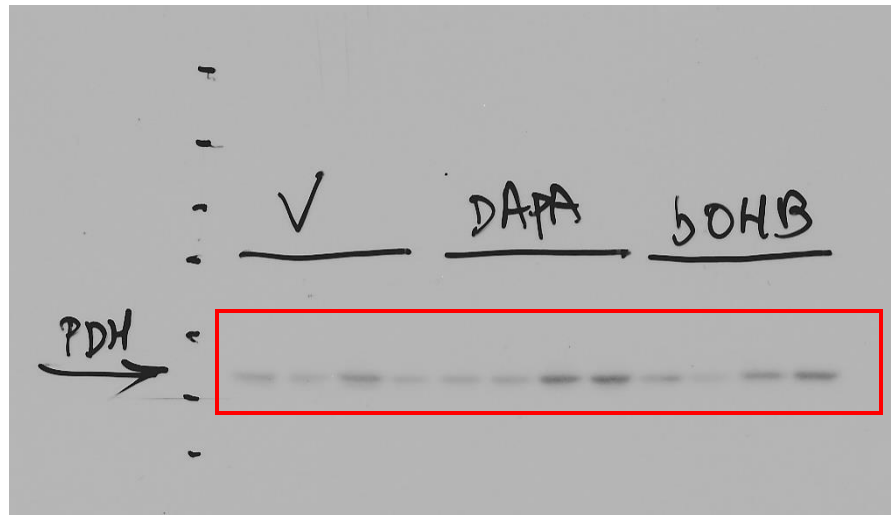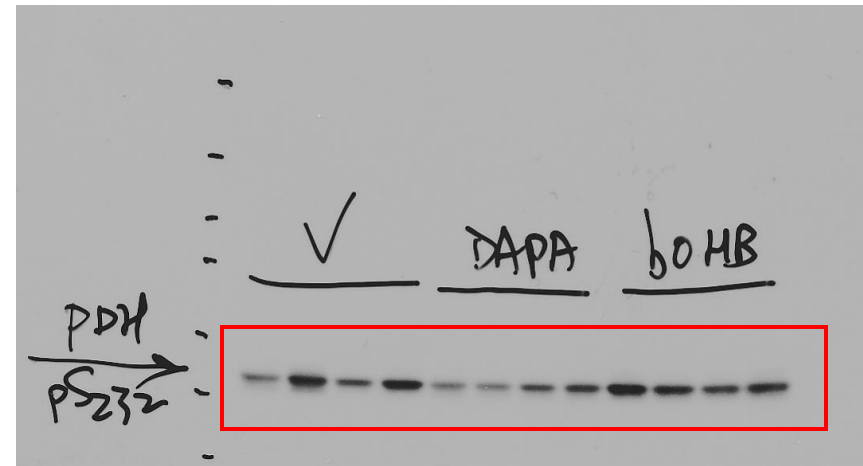

Figure 3H

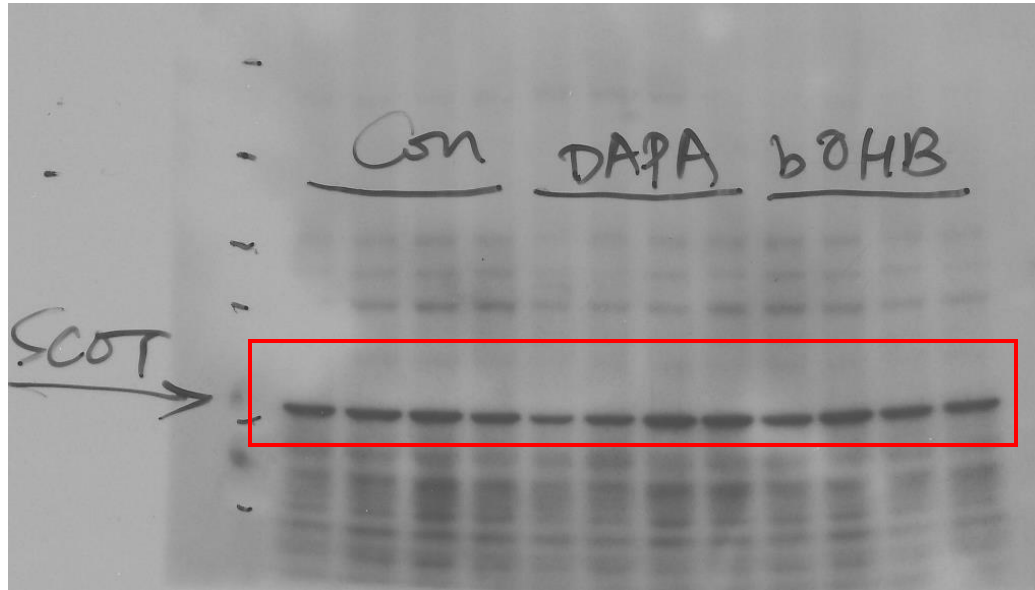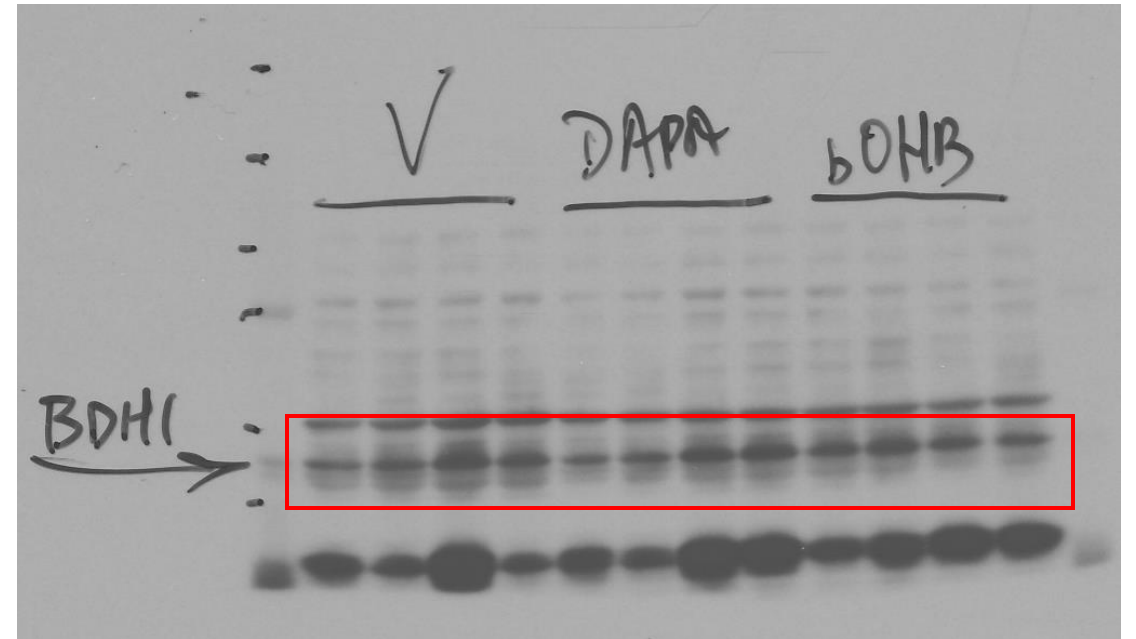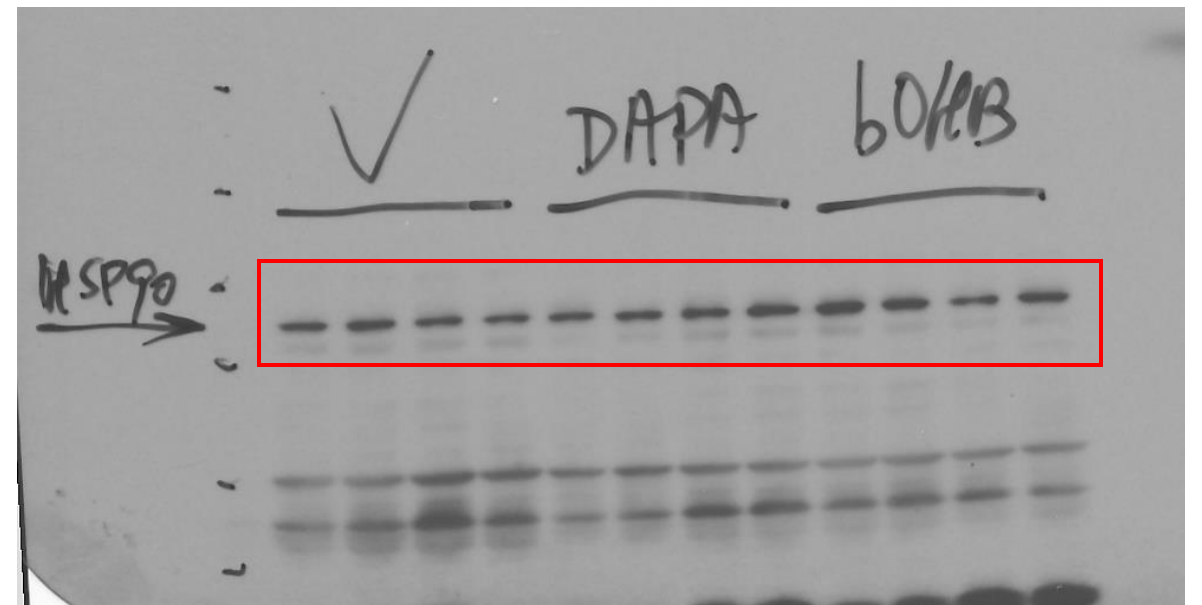

Figure 5G

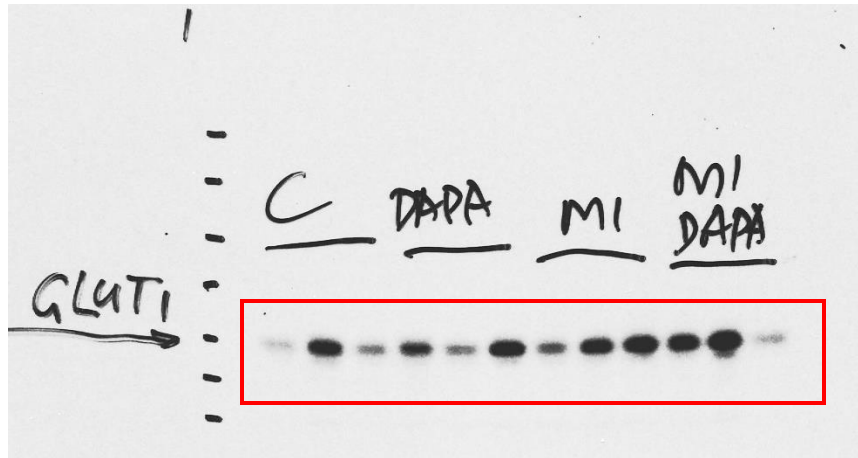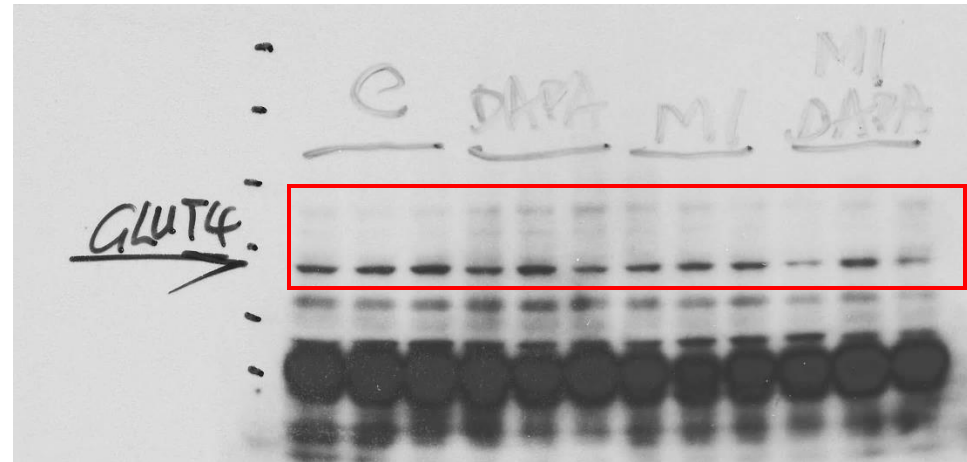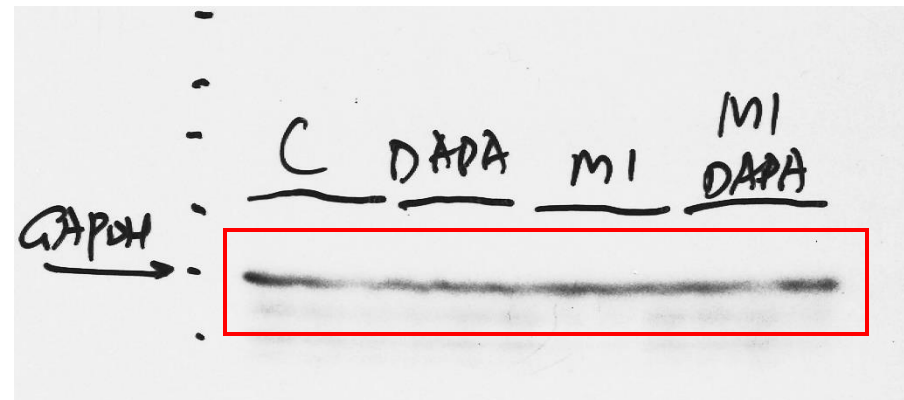

Figure 5H

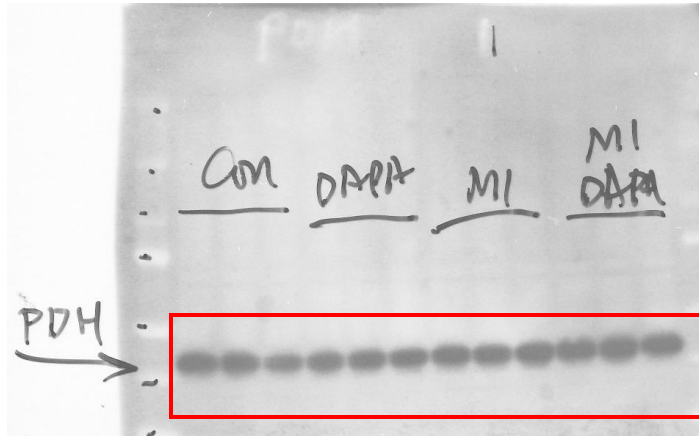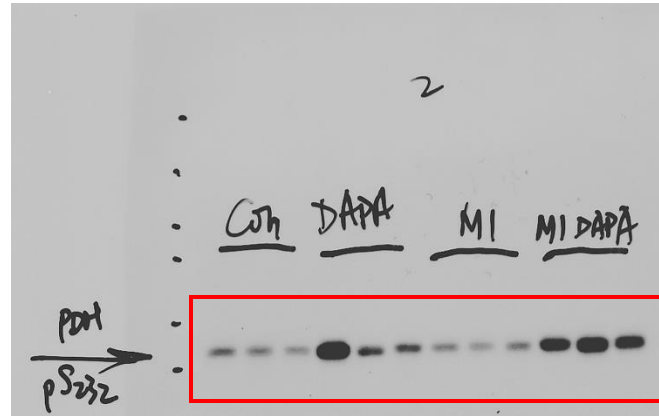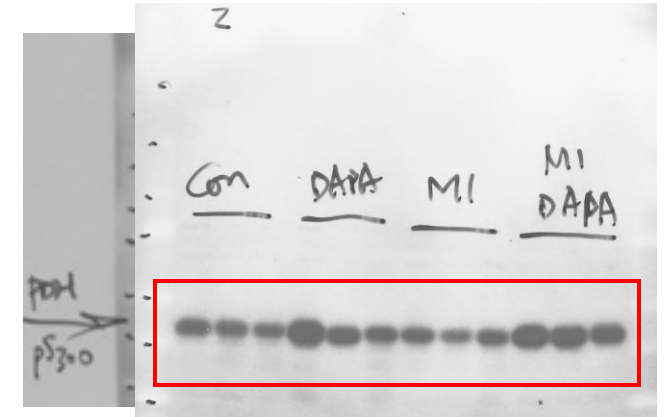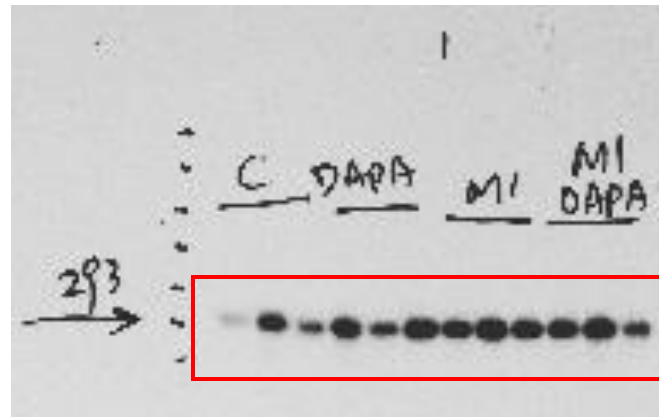

Figure 5I

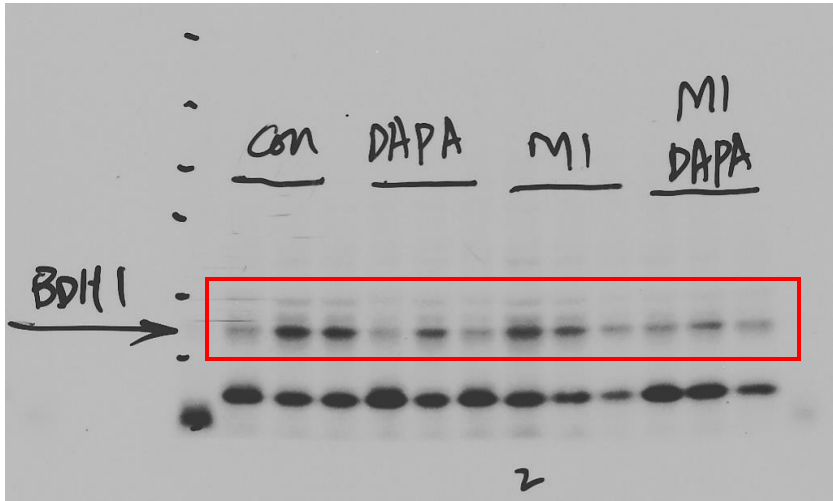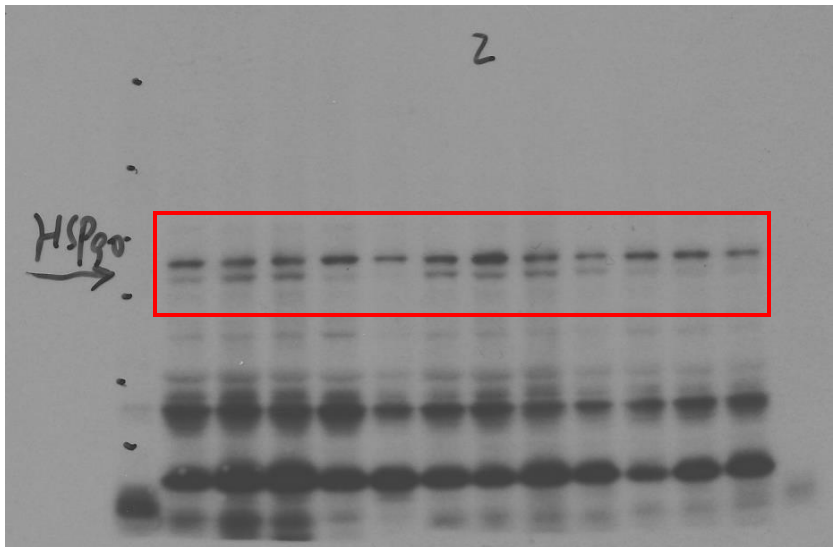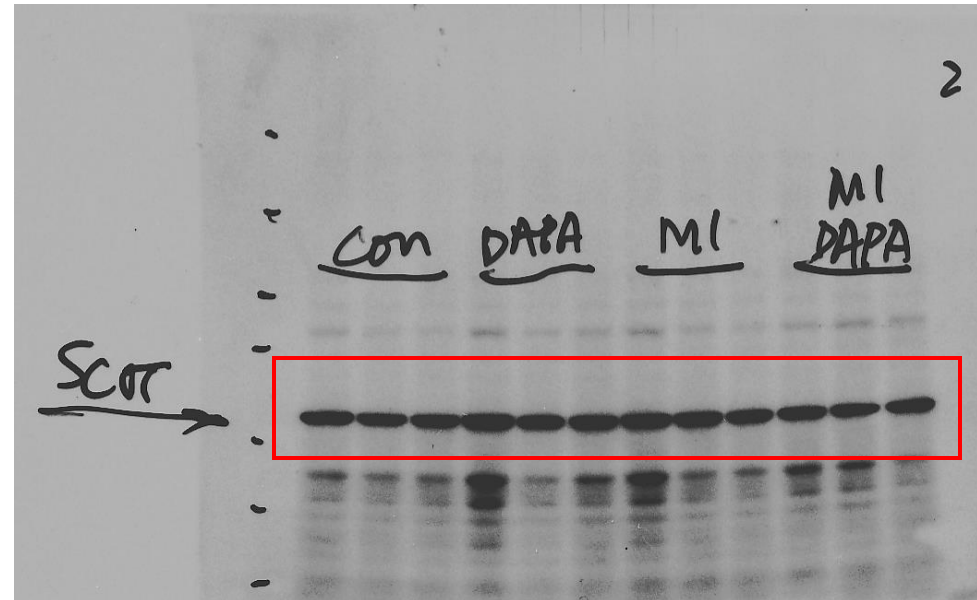



Figure 8E

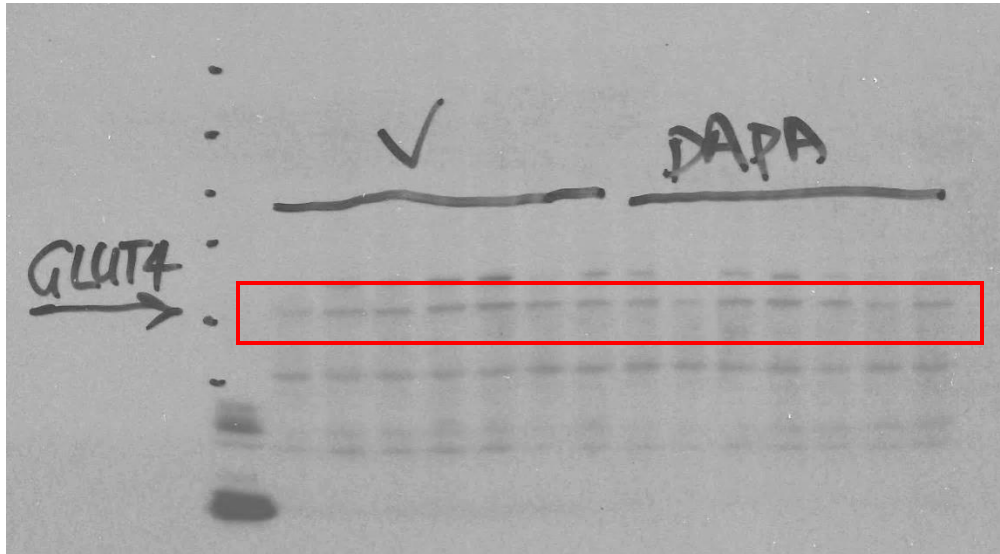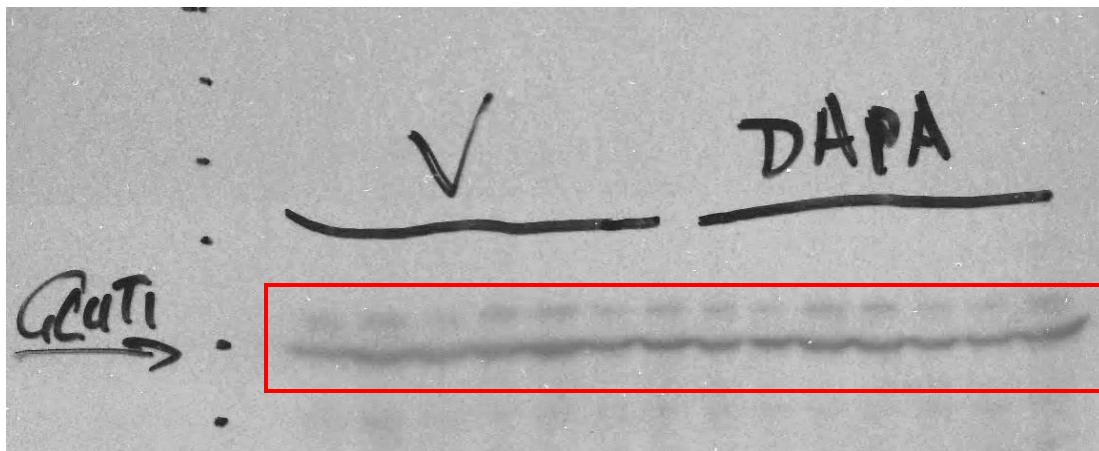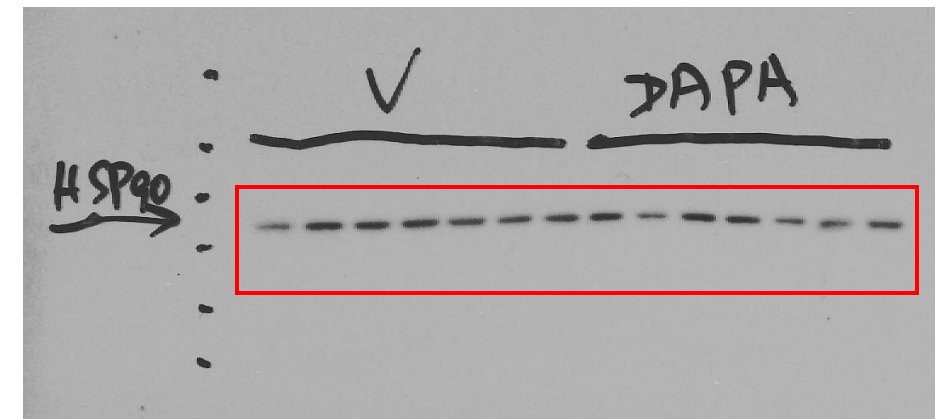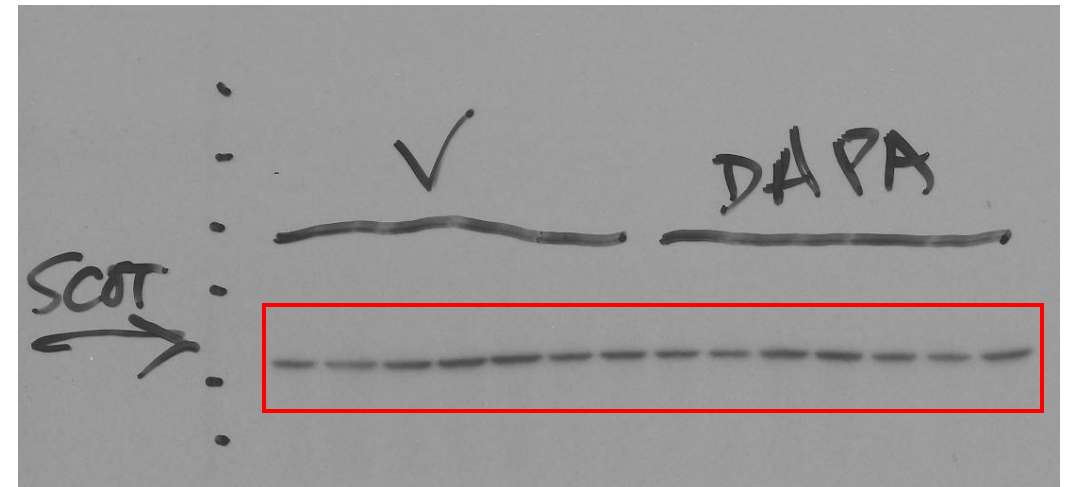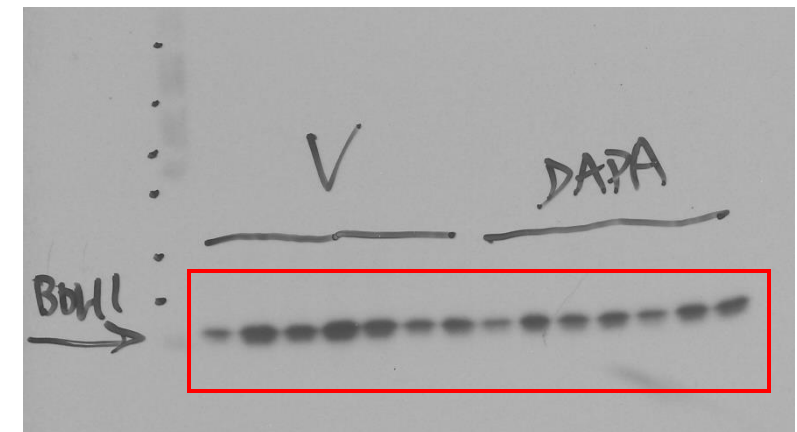



Figure 8F

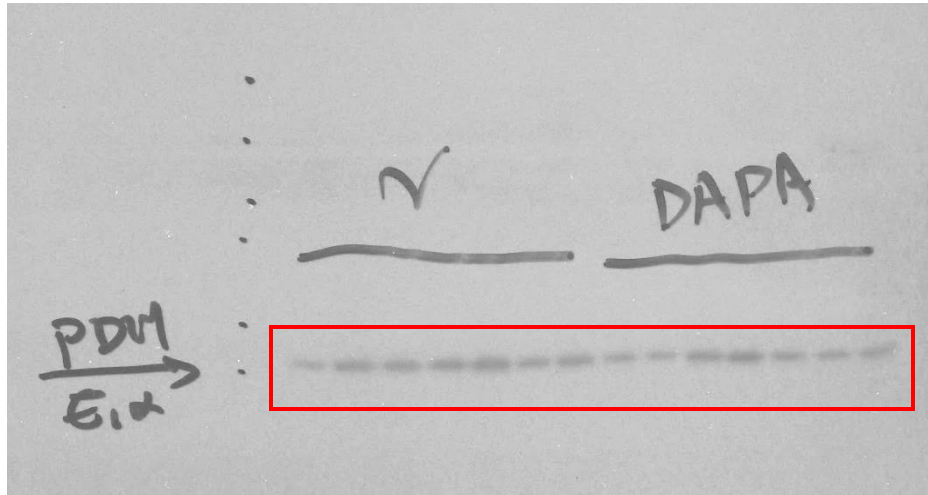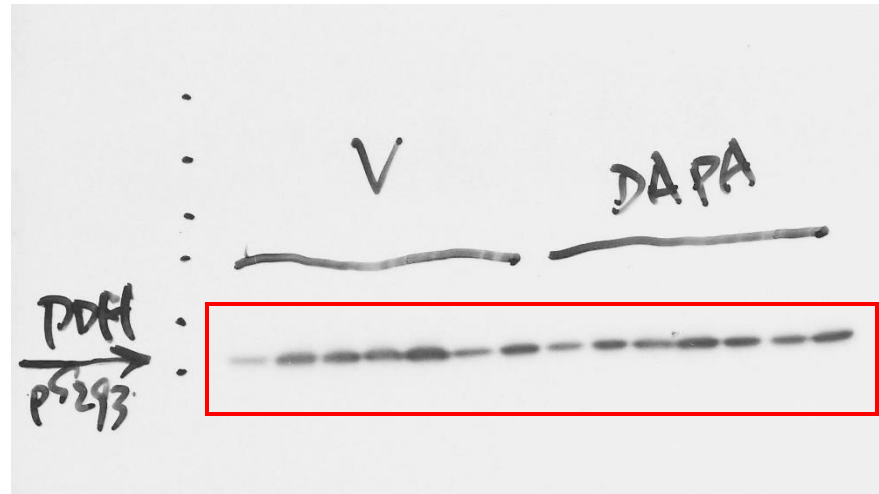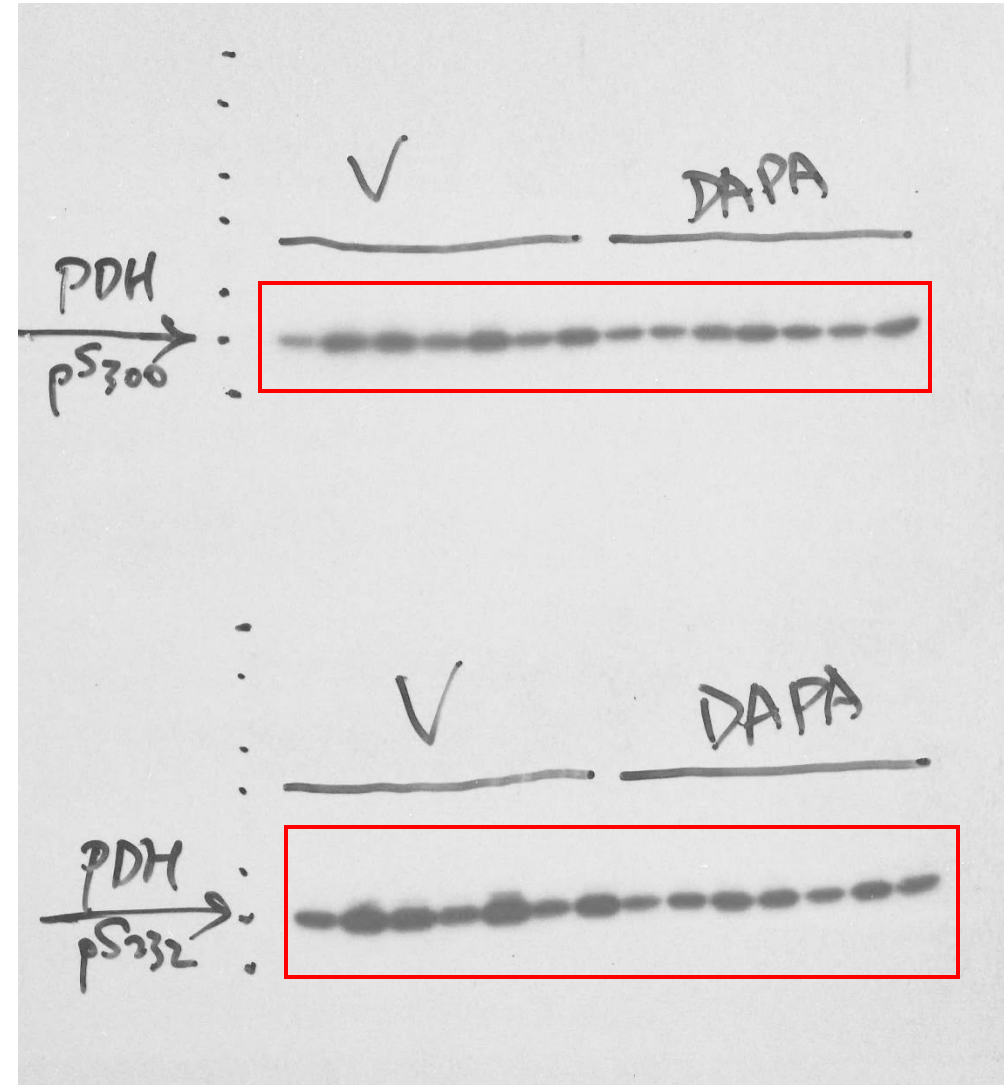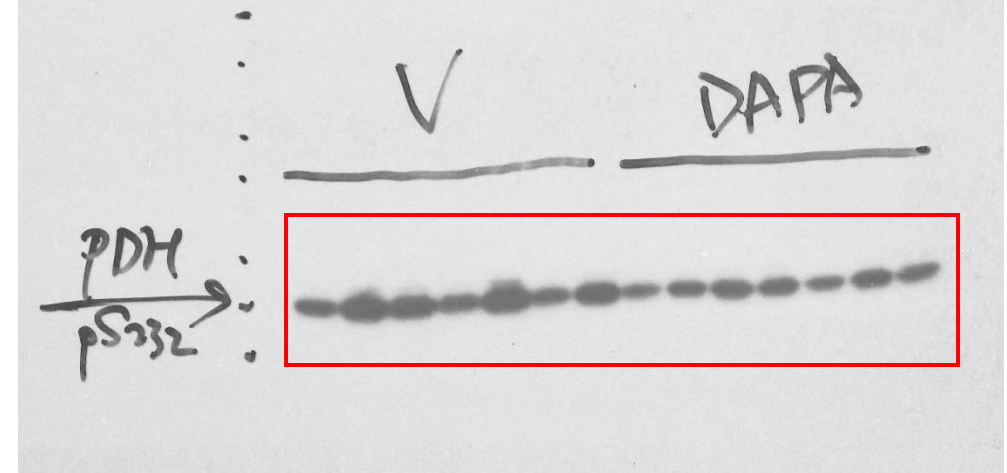

Supplement: sd2 [file 2]
